# Supplementary material
Source: MDPI journal article supplement (https://www.mdpi.com/2673-8236/3/1/11)
Supplement: s1 [file s1]

**Supplementary File:****Table S1.** Description of Gene Expression Omnibus data sets of T2DM and Healthy Controls.

| GEO<br>accession ID   | T2DM <sup>a</sup> |              |                        | Control |              |                        | Platform                                                              | Country          | Year |
|-----------------------|-------------------|--------------|------------------------|---------|--------------|------------------------|-----------------------------------------------------------------------|------------------|------|
|                       | n                 | Sex<br>(M/F) | Mean<br>age<br>(years) | n       | Sex<br>(M/F) | Mean<br>age<br>(years) |                                                                       |                  |      |
| GSE156993             | 6                 | 3/3          | 54                     | 6       | 2/4          | 41.16                  | [HG-U133_Plus_2]<br>Affymetrix Human<br>Genome U133<br>Plus 2.0 Array | Brazil           | 2020 |
| GSE9006               | 12                | 6/6          | 13.41                  | 2<br>0  | 7/13         | 11.65                  | Affymetrix Human<br>Genome U133B<br>Array                             | United<br>States | 2007 |
| GSE21321<br>(GLP6883) | 9                 | 9/0          |                        | 8       | 9/0          |                        | Illumina<br>HumanRef-8 v3.0<br>expression<br>beadchip                 | Singapor<br>e    | 2010 |

The 'a' represents Type 2 Diabetes Mellitus, which is an expansion of the abbreviation 'T2DM'.

**Table S2.** Description of selection criteria for sorting of Gene Expression Omnibus data sets of T2DM and Healthy Controls.

| Parameters        | Inclusion criteria             | Exclusion criteria                                                                                                                                                                                                                                                                                                                                                                 |
|-------------------|--------------------------------|------------------------------------------------------------------------------------------------------------------------------------------------------------------------------------------------------------------------------------------------------------------------------------------------------------------------------------------------------------------------------------|
| Organism:         | Human (Homo sapiens)           | Mus musculus, Rattus norvegicus, Xenopus laevis                                                                                                                                                                                                                                                                                                                                    |
| Data entry types: | Datasets                       | Series, Samples, Platforms                                                                                                                                                                                                                                                                                                                                                         |
| Study Type:       | Expression profiling by array  | <ul style="list-style-type: none"> <li>• Expression profiling by MPSS/RT-PCR/SAGE/SNP array/genome tiling array/high throughput sequencing;</li> <li>• Genome binding/occupancy profiling by SNP array/array/genome tiling array/high throughput sequencing;</li> <li>• Genome variation profiling by SNP array/ array/ genome tiling array/ high throughput sequencing</li> </ul> |
| Sample:           | Blood and PBMC                 | Tissue, Serum, Semen, Saliva, Urine, Body Fluid                                                                                                                                                                                                                                                                                                                                    |
| Disorders         | T2DM compared to non-diabetics | Type 1 Diabetes, Gestational Diabetes, Prediabetes with non-diabetic                                                                                                                                                                                                                                                                                                               |

**Table S3.** Description of MicroRNA Expression Omnibus data sets of T2DM and Healthy Controls.

| GEO<br>accession ID | T2DM <sup>a</sup> |              |                        | Control |                  |                        | Platform                                              | Country   | Year |
|---------------------|-------------------|--------------|------------------------|---------|------------------|------------------------|-------------------------------------------------------|-----------|------|
|                     | n                 | Sex<br>(M/F) | Mean<br>age<br>(years) | n       | Sex<br>(M/<br>F) | Mean<br>age<br>(years) |                                                       |           |      |
| GSE51674            | 6                 | 4/2          | 59.33                  | 4       | 3/1              | 38                     | Human miRNA<br>Microarray v14<br>Rev.2                | Italy     | 2019 |
| GSE21321            | 9                 | 9/0          | -                      | 10      | 10/0             | -                      | Illumina<br>HumanRef-8 v3.0<br>expression<br>beadchip | Singapore | 2010 |

The 'a' represents Type 2 Diabetes Mellitus, which is an expansion of the abbreviation 'T2DM'.

**Table S4.** Description of selection criteria for sorting of MicroRNA Expression Omnibus data sets of T2DM and Healthy Controls.

| Parameters        | Inclusion criteria             | Exclusion criteria                                                                                                                                                                                                                                                                                                                                                                 |
|-------------------|--------------------------------|------------------------------------------------------------------------------------------------------------------------------------------------------------------------------------------------------------------------------------------------------------------------------------------------------------------------------------------------------------------------------------|
| Organism:         | Human (Homo sapiens)           | Mus musculus, Rattus norvegicus, Arabidopsis thaliana, Danio rerio                                                                                                                                                                                                                                                                                                                 |
| Data entry types: | Datasets                       | Series, Samples, Platforms                                                                                                                                                                                                                                                                                                                                                         |
| Study Type:       | Expression profiling by array  | <ul style="list-style-type: none"> <li>• Expression profiling by MPSS/RT-PCR/SAGE/SNP array/genome tiling array/high throughput sequencing;</li> <li>• Genome binding/occupancy profiling by SNP array/array/genome tiling array/high throughput sequencing;</li> <li>• Genome variation profiling by SNP array/ array/ genome tiling array/ high throughput sequencing</li> </ul> |
| Sample:           | Tissue, Blood and PBMC         | Semen, Saliva, Urine, Body Fluid                                                                                                                                                                                                                                                                                                                                                   |
| Disorders         | T2DM compared to non-diabetics | Type 1 Diabetes, Gestational Diabetes, Prediabetes with non-diabetic                                                                                                                                                                                                                                                                                                               |

**Table S5.** ANOVA test for clinical, biochemical and gene and microRNA expression profiles for T2DM patients, DN patients and healthy control subjects.

| <b>Descriptive</b>                    | <b>Healthy Control<br/>(n=36)</b> | <b>T2DM<br/>(n=38)</b> | <b>Diabetic<br/>Nephropathy<br/>(n=35)</b> | <b>F</b> | <b>Sig.</b> |
|---------------------------------------|-----------------------------------|------------------------|--------------------------------------------|----------|-------------|
| Age (Years)                           | 31.25 ± 6.31                      | 49.11 ± 6.43           | 61.57 ± 10.52                              | 130.98   | <b>0.00</b> |
| Body Mass Index                       | 24.59 ± 1.89                      | 27.47 ± 3.65           | 26.07 ± 5.70                               | 2.76     | 0.07        |
| Waist–hip Ratio                       | 0.90 ± 0.04                       | 0.96 ± 0.07            | 0.95 ± 0.07                                | 4.39     | <b>0.02</b> |
| HbA1c (%)                             | 5.20 ± 0.26                       | 9.42 ± 2.22            | 8.09 ± 1.72                                | 43.69    | <b>0.00</b> |
| Fasting Blood Sugar                   | 95.59 ± 8.25                      | 203.28 ± 81.79         | 180.45 ± 48.67                             | 35.60    | <b>0.00</b> |
| HOMA-IR                               | 2.89 ± 2.31                       | 8.09 ± 9.36            | 11.82 ± 13.73                              | 7.25     | <b>0.00</b> |
| Cholesterol                           | 167.56 ± 36.93                    | 187.69 ± 43.24         | 178.91 ± 62.94                             | 1.55     | 0.22        |
| Triglycerides                         | 122.75 ± 44.4                     | 174.14 ± 91.8          | 172.35 ± 86.6                              | 4.97     | <b>0.00</b> |
| Low-density lipoprotein               | 94.69 ± 38.9                      | 114.75 ± 35.5          | 109.65 ± 53.40                             | 2.05     | <b>0.13</b> |
| High-density lipoprotein              | 43.11 ± 12.1                      | 40.42 ± 9.0            | 43.91 ± 11.0                               | 0.99     | <b>0.37</b> |
| Urea                                  | 23.11 ± 6.70                      | 26.07 ± 10.76          | 80.34 ± 35.84                              | 69.32    | <b>0.00</b> |
| Creatinine                            | 0.90 ± 0.18                       | 0.75 ± 0.19            | 2.74 ± 1.90                                | 33.19    | <b>0.00</b> |
| Insulin (mIU/L)                       | 12.30 ± 9.36                      | 15.71 ± 17.17          | 28.18 ± 29.15                              | 5.91     | <b>0.00</b> |
| GFR (mL/min per 1.73 m <sup>2</sup> ) | 99.26 ± 34.94                     | 117.45 ± 37.74         | 35.93 ± 22.26                              | 58.54    | <b>0.00</b> |

**Table S6.** ANOVA test for Circulating gene (PTEN, MMP2 & NF- $\kappa$ B) and MicroRNA (hsa-miR-181b-5p) expression profiles for T2DM patients, DN patients and healthy control subjects.

| Types of Sample                               | PTEN (Blood)    | MMP2 (Blood)    | NF- $\kappa$ B (Blood) | miR-181b-5p (Blood) |
|-----------------------------------------------|-----------------|-----------------|------------------------|---------------------|
| <b>Healthy Control</b> (Mean $\pm$ SD) (n=36) | 1 $\pm$ 0.05    | 1 $\pm$ 0.05    | 1 $\pm$ 0.05           | 1 $\pm$ 0.05        |
| <b>T2DM</b> (Mean $\pm$ SD) (n=38)            | 0.84 $\pm$ 0.85 | 0.84 $\pm$ 1.03 | 1.72 $\pm$ 1.29        | 2.09 $\pm$ 0.09     |
| <b>DN</b> (Mean $\pm$ SD) (n=35)              | 0.63 $\pm$ 0.64 | 0.70 $\pm$ 0.55 | 1.80 $\pm$ 1.29        | 3.16 $\pm$ 2.79     |
| <b>F Value</b>                                | 2.97            | 1.54            | 8.74                   | 14.14               |
| <b>P-value</b>                                | <b>0.05</b>     | 0.22            | <b>0.05</b>            | <b>0.00</b>         |
| Trend                                         | Downregulation  | Downregulation  | Upregulation           | Upregulation        |

**Table S7.** T-test for Circulating gene (PTEN, MMP2 & NF- $\kappa$ B) and MicroRNA (hsa-miR-181b-5p) expression profiles for T2DM patients, DN patients and healthy control subjects.

| Types of Sample                    | PTEN (Blood)    | MMP2 (Blood)    | NF- $\kappa$ B1 (Blood) | miR-181b-5p (Blood) |
|------------------------------------|-----------------|-----------------|-------------------------|---------------------|
| <b>T2DM</b> (Mean $\pm$ SD) (n=38) | 0.84 $\pm$ 0.85 | 0.84 $\pm$ 1.03 | 1.72 $\pm$ 1.29         | 2.09 $\pm$ 0.09     |
| <b>DN</b> (Mean $\pm$ SD) (n=35)   | 0.63 $\pm$ 0.64 | 0.70 $\pm$ 0.55 | 1.80 $\pm$ 1.29         | 3.16 $\pm$ 2.79     |
| <b>t Value</b>                     | 0.264           | 0.708           | 0.309                   | 2.147               |
| <b>P-value</b>                     | 0.064           | 0.482           | 0.758                   | <b>0.03</b>         |
| <b>Trend</b>                       | Downregulation  | Downregulation  | Upregulation            | Upregulation        |

**Table S8.** Multinomial logistic regression analysis of circulating gene (PTEN, MMP2 & NF- $\kappa$ B) and MicroRNA (hsa-miR-181b-5p) expression profiles for T2DM patients, DN patients and healthy control subjects.

|                 | <b>B</b> | <b>Std. Error</b> | <b>Wald</b> | <b>Sig.</b> | <b>Exp(B)</b> | <b>95% Confidence Interval for Exp(B)</b> |             |
|-----------------|----------|-------------------|-------------|-------------|---------------|-------------------------------------------|-------------|
|                 |          |                   |             |             |               | Lower Bound                               | Upper Bound |
| PTEN            | -0.659   | 0.457             | 2.078       | 0.15        | 0.517         | 0.211                                     | 1.268       |
| hsa-miR-181b-5p | 0.707    | 0.286             | 6.136       | <b>0.01</b> | 2.029         | 1.159                                     | 3.551       |
| MMP2            | -0.557   | 0.352             | 2.499       | 0.11        | 0.573         | 0.287                                     | 1.143       |
| NF- $\kappa$ B  | 0.872    | 0.322             | 7.342       | <b>0.01</b> | 2.392         | 1.273                                     | 4.495       |



**Table S9.** T-test for Circulating gene (PTEN, MMP2 & NF- $\kappa$  $\beta$ ) and MicroRNA (hsa-miR-181b-5p) expression profiles for Insulin Resistance patients and Insulin Sensitive subjects.

| Types of Sample                  | PTEN (Blood)    | MMP2 (Blood)    | NF- $\kappa$ $\beta$ 1 (Blood) | miR-181b-5p (Blood) |
|----------------------------------|-----------------|-----------------|--------------------------------|---------------------|
| <b>Insulin Sensitive (n=36)</b>  | 1 $\pm$ 0.05    | 1 $\pm$ 0.05    | 1 $\pm$ 0.05                   | 1 $\pm$ 0.05        |
| <b>Insulin Resistance (n=47)</b> | 0.70 $\pm$ 0.57 | 0.77 $\pm$ 0.69 | 1.83 $\pm$ 1.02                | 2.698 $\pm$ 2.30    |
| <b>t-value</b>                   | 3.268           | 2.146           | 5.507                          | 4.947               |
| <b>p-value</b>                   | <b>0.002</b>    | 0.38            | <b>0.000</b>                   | <b>0.000</b>        |
| <b>Trend</b>                     | Downregulation  | Downregulation  | Upregulation                   | Upregulation        |

**Table 10.** ANOVA test for Circulating gene (PTEN, MMP2 & NF- $\kappa$ B) and MicroRNA (hsa-miR-181b-5p) expression profiles for T2DM (Insulin Resistance) & DN (Insulin Resistance) patients and healthy control (Insulin Sensitive) subjects.

| Types of Sample                                   | PTEN (Blood)    | MMP2 (Blood)    | NF- $\kappa$ B1 (Blood) | miR-181b-5p (Blood) |
|---------------------------------------------------|-----------------|-----------------|-------------------------|---------------------|
| <b>Healthy Control (Insulin Sensitive) (n=36)</b> | 1 $\pm$ 0.05    | 1 $\pm$ 0.05    | 1 $\pm$ 0.05            | 1 $\pm$ 0.05        |
| <b>T2DM (Insulin Resistance) (n=23)</b>           | 0.75 $\pm$ 0.62 | 0.83 $\pm$ 0.78 | 1.82 $\pm$ 1.67         | 2.19 $\pm$ 0.89     |
| <b>DN (Insulin Resistance) (n=24)</b>             | 0.66 $\pm$ 0.52 | 0.71 $\pm$ 0.58 | 1.84 $\pm$ 0.88         | 3.14 $\pm$ 2.96     |
| <b>Student's t-value</b>                          | 0.495           | 0.603           | 0.064                   | 1.494               |
| <b>p-value</b>                                    | 0.623           | 0.553           | 0.949                   | 0.147               |
| <b>Trend</b>                                      | Downregulation  | Downregulation  | No change               | Upregulation        |

**Table S11.** ANOVA test for Circulating gene (PTEN, MMP2 & NF-κβ) and MicroRNA (hsa-miR-181b-5p) expression profiles for five stages of chronic kidney disease.

| Stages  | Stages of CKD                                                                                 | GFR          | % of<br>Kidney<br>Function | MMP2 (FCE)<br>(Mean ± SD) | PTEN (FCE)<br>(Mean ± SD) | NF-κβ (FCE)<br>(Mean ± SD) | hsa-miR-181b-5p<br>(FCE)<br>(Mean ± SD) |
|---------|-----------------------------------------------------------------------------------------------|--------------|----------------------------|---------------------------|---------------------------|----------------------------|-----------------------------------------|
| Stage:1 | Normal kidney function                                                                        | 90 or Higher | 90-100                     | 0.904 ± 0.822             | 0.923 ± 0.662             | 1.152 ± 0.818              | 1.412 ± 0.618                           |
| Stage:2 | Kidney damage with mild loss of kidney function                                               | 89-60        | 89-60                      | 0.900 ± 0.355             | 0.908 ± 0.319             | 1.438 ± 0.779              | 2.194 ± 2.764                           |
| Stage:3 | 3a: kidney damage with mild to moderate<br><br>3b: Moderate to severe loss of kidney function | 59-30        | 59-30                      | 0.678 ± 0.541             | 0.569 ± 0.482             | 1.629 ± 0.837              | 2.229 ± 0.845                           |
| Stage:4 | Severe loss of kidney function                                                                | 44-30        | 44-30                      | 0.621 ± 0.541             | 0.476 ± 0.572             | 1.811 ± 0.721              | 2.559 ± 2.173                           |
| Stage:5 | Kidney failure                                                                                | 29-15        | 29-15                      | 0.335 ± 0.179             | 0.417 ± 0.117             | 1.908 ± 0.587              | 3.555 ± 2.161                           |
| F-value |                                                                                               |              |                            | 1.079                     | 2.431                     | 2.458                      | 2.399                                   |
| p-Value |                                                                                               |              |                            | 0.372                     | <b>0.05</b>               | <b>0.05</b>                | <b>0.05</b>                             |
| Trend   |                                                                                               |              |                            | Downregulation            | Downregulation            | Upregulation               | Upregulation                            |

**Table S12.** Pathway enrichment (KEGG Pathways) analysis for PPI Genes by STRING database.

| KEGG Pathways                                        | Negative<br>log10<br>(FDR) | False<br>Rate | Discovery<br>matching proteins in your network (labels) |
|------------------------------------------------------|----------------------------|---------------|---------------------------------------------------------|
| T cell receptor signaling pathway                    | 6.96                       | 0.00          | NF- $\kappa$ BIA, NF- $\kappa$ B1, CHUK, RELA, PIK3R1   |
| Insulin resistance                                   | 6.90                       | 0.00          | NF- $\kappa$ BIA, NF- $\kappa$ B1, PTEN, RELA, PIK3R1   |
| PI3K-Akt signaling pathway                           | 6.12                       | 0.00          | NF- $\kappa$ B1, TP53, CHUK, PTEN, RELA, PIK3R1         |
| Th1 and Th2 cell differentiation                     | 5.50                       | 0.00          | NF- $\kappa$ BIA, NF- $\kappa$ B1, CHUK, RELA           |
| IL-17 signaling pathway                              | 5.43                       | 0.00          | NF- $\kappa$ BIA, NF- $\kappa$ B1, CHUK, RELA           |
| AGE-RAGE signaling pathway in diabetic complications | 5.33                       | 0.00          | MMP2, NF- $\kappa$ B1, RELA, PIK3R1                     |
| Endocrine resistance                                 | 3.64                       | 0.00          | MMP2, TP53, PIK3R1                                      |
| mTOR signaling pathway                               | 3.09                       | 0.00          | CHUK, PTEN, PIK3R1                                      |

**Table S13.** Gene Ontology (Biological Process) analysis for PPI Genes by STRING database.

| Biological Process                                             | false discovery rate | Negative<br>log10<br>(FDR) | Genes                                                                                    |
|----------------------------------------------------------------|----------------------|----------------------------|------------------------------------------------------------------------------------------|
| Response to cytokine<br>I-kappaB kinase/NF-kappaB<br>signaling | 0.00                 | 6.62                       | NF- $\kappa$ B1A, TIMP1, MMP2, RELB, NF- $\kappa$ B1, TIMP2, TP53, CHUK, RELA,<br>PIK3R1 |
| Regulation of phosphatidylinositol 3-<br>kinase signaling      | 0.00                 | 5.53                       | NF- $\kappa$ B1A, RELB, NF- $\kappa$ B1, CHUK, RELA                                      |
| T cell receptor signaling pathway                              | 0.00                 | 3.46                       | SLC9A3R1, PTEN, NEDD4, PIK3R1                                                            |
| Extracellular matrix disassembly                               | 0.00                 | 3.10                       | NF- $\kappa$ B1, CHUK, RELA, PIK3R1                                                      |
| Inflammatory response                                          | 0.00                 | 2.74                       | TIMP1, MMP2, TIMP2                                                                       |
| Phosphatidylinositol 3-kinase<br>signaling                     | 0.00                 | 2.70                       | TIMP1, RELB, NF- $\kappa$ B1, CHUK, RELA                                                 |
| Response to insulin                                            | 0.02                 | 1.74                       | PTEN, PIK3R1                                                                             |
|                                                                | 0.03                 | 1.58                       | PTEN, RELA, PIK3R1                                                                       |

**Table S14.** Gene Ontology (Molecular Functions) analysis for PPI Genes by STRING database.

| Molecular Functions                     | false discovery rate | Negative (FDR) | Log10 | Gene Symbols                                                                                           |
|-----------------------------------------|----------------------|----------------|-------|--------------------------------------------------------------------------------------------------------|
| Enzyme binding                          | 0.00                 | 4.83           |       | NF- $\kappa$ BIA, TIMP1, RELB, NF- $\kappa$ B1, SLC9A3R1, TIMP2, TP53, PTEN, RELA, NEDD4, PIK3R1       |
| Signaling receptor binding              | 0.00                 | 2.37           |       | TIMP1, SLC9A3R1, TIMP2, TP53, CHUK, PTEN, NEDD4, PIK3R1                                                |
| Protein-containing complex binding      | 0.01                 | 2.27           |       | SLC9A3R1, TIMP2, TP53, CHUK, PTEN, RELA, PIK3R1                                                        |
| beta-2 adrenergic receptor binding      | 0.01                 | 2.19           |       | SLC9A3R1, NEDD4                                                                                        |
| Protein binding                         | 0.02                 | 1.66           |       | NF- $\kappa$ BIA, TIMP1, RELB, NF- $\kappa$ B1, SLC9A3R1, TIMP2, TP53, CHUK, PTEN, RELA, NEDD4, PIK3R1 |
| Transcription factor binding            | 0.02                 | 1.66           |       | NF- $\kappa$ BIA, NF- $\kappa$ B1, TP53, RELA, PIK3R1                                                  |
| Metalloendopeptidase inhibitor activity | 0.02                 | 1.66           |       | TIMP1, TIMP2                                                                                           |
| Molecular function regulator            | 0.02                 | 1.66           |       | TIMP1, RELB, NF- $\kappa$ B1, SLC9A3R1, TIMP2, TP53, RELA, NEDD4, PIK3R1                               |
| Protein tyrosine kinase binding         | 0.02                 | 1.66           |       | TP53, PTEN, PIK3R1                                                                                     |

**Table S15.** The Validation of fold change expression for PPI interacting and key genes in three different microarray datasets of circulating T2DM and healthy subjects.

| Gene Symbols     | Healthy Control |        | T2DM (GSE156993)       |         | T2DM (GSE9006)         |         | T2DM (GSE21321) |        |         |
|------------------|-----------------|--------|------------------------|---------|------------------------|---------|-----------------|--------|---------|
|                  | Fold Expression | Change | Fold Change Expression | P Value | Fold Change Expression | P Value | Fold Expression | Change | P Value |
| CHUK             | 1.00            |        | 1.04                   | 0.58    | 1.18                   | 0.18    | 0.98            |        | 0.90    |
| MMP2             | 1.00            |        | 0.94                   | 0.21    | 0.62                   | 0.01    | 0.74            |        | 0.41    |
| NEDD4            | 1.00            |        | 1.07                   | 0.53    | 1.32                   | 0.00    | 0.87            |        | 0.54    |
| NF- $\kappa$ B1  | 1.00            |        | 1.17                   | 0.27    | 1.32                   | 0.00    | 1.05            |        | 0.76    |
| NF- $\kappa$ B1A | 1.00            |        | 0.91                   | 0.26    | 0.79                   | 0.16    |                 |        |         |
| PTEN             | 1.00            |        | 0.78                   | 0.02    | 0.84                   | 0.02    | 0.9             |        | 0.64    |
| RELA             | 1.00            |        | 1                      | 0.57    | 1.01                   | 0.10    |                 |        |         |
| RELB             | 1.00            |        | 1                      | 0.42    | 0.86                   | 0.20    | 1.54            |        | 0.15    |
| SLC9A3R1         | 1.00            |        | 0.87                   | 0.20    | 0.94                   | 0.54    | 1               |        | 0.72    |
| TIMP1            | 1.00            |        | 1.02                   | 0.14    | 1.2                    | 0.08    | 1.02            |        | 0.95    |
| TIMP2            | 1.00            |        | 0.98                   | 0.20    | 0.88                   | 0.31    | 0.94            |        | 0.65    |
| TP53             | 1.00            |        | 0.94                   | 0.50    | 0.75                   | 0.00    | 1               |        | 0.99    |

**Table S16.** The Validation of fold change expression for hsa-miR-181b-5p in three different microarray datasets (GSE21321) of circulating T2DM and healthy subjects.

| ID   | P.Value  | t        | B     | Fold<br>Change | logFC    | Gene.symbol  | Gene.title              |
|------|----------|----------|-------|----------------|----------|--------------|-------------------------|
| 1852 | 0.028861 | 1.094422 | -6.38 | 1.343228       | 0.425704 | hsa-miR-181b | AACAUUCAUUGCUGUCGGUGGGU |

**Table S17.** The Validation of fold change expression for hsa-miR-181b-5p in three different microarray datasets (GSE51674) of kidney tissue of T2DM and healthy subjects.

| ID           | P.Value | t    | B     | Fold<br>Change | logFC         | ORGANISM     | miRNA_ID     |
|--------------|---------|------|-------|----------------|---------------|--------------|--------------|
| hsa-miR-181b | 0.03    | 2.57 | -4.58 | 3.31           | 9.93296893853 | Homo sapiens | hsa-miR-181b |
